# Supplementary material for: Hyperthermic seizures and aberrant cellular homeostasis in Drosophila dystrophic muscles
Source: PubMed Central journal article supplement — Sci Rep. 2011 Jul 28;1:47. doi: 10.1038/srep00047 (PMC3216534; doi:10.1038/srep00047), 2011-07-28
Supplement: srep00047-s1.pdf [file srep00047-s1.pdf]

**Hyperthermic seizures and aberrant cellular homeostasis in *Drosophila*  
dystrophic muscles**

April K Marrone<sup>1</sup>, Mariya M Kucherenko<sup>1</sup>, Robert Wiek<sup>2</sup>, Martin C Göpfert<sup>2</sup>, Halyna R Shcherbata<sup>1\*</sup>

<sup>1</sup>Max Planck Gene Expression and Signaling Group, Max Planck Institute for Biophysical Chemistry, Am Fassberg 11, 37077, Göttingen, Germany

<sup>2</sup>Department of Cellular Neurobiology, Georg August University, Max Planck Institute for Experimental Medicine, Hermann Rein 3, 37075 Göttingen, Germany

\*corresponding author: [halyna.shcherbata@mpibpc.mpg.de](mailto:halyna.shcherbata@mpibpc.mpg.de)  
Max Planck Gene Expression and Signaling Group, MPIbpc  
Am Fassberg 11, Göttingen  
37077 Germany  
Tel: +495512011656  
Fax: +495512011755

## Supplementary Information

Supplementary Table 1: ROS levels seen in *Dys*, *Dg* and *Cam* mutants

| Genotype                                          | ROS<br>([AU]/ $\mu$ g/ml<br>protein) | P-Value                  |
|---------------------------------------------------|--------------------------------------|--------------------------|
| <i>OregonR</i> <sup>2</sup>                       | 1.00 $\pm$ 0.26                      | -                        |
| <i>DysDf/+</i>                                    | 1.25 $\pm$ 0.83                      | 0.091                    |
| <i>Dg</i> <sup>O86</sup> /+                       | 1.04 $\pm$ 0.14                      | 0.37                     |
| <i>Cam</i> <sup>n339</sup> /+                     | 0.88 $\pm$ 0.10                      | 0.22                     |
| <i>DysDf</i>                                      | 4.66 $\pm$ 2.54                      | 3.0X10 <sup>-8</sup> *** |
| <i>Dg</i> <sup>O86/O55</sup>                      | 0.61 $\pm$ 0.37                      | 0.0074**                 |
| <i>Dg</i> <sup>O86</sup> /+; <i>DysDf</i> /+      | 0.66 $\pm$ 0.22                      | 0.0034**                 |
| <i>Cam</i> <sup>n339</sup> /+; <i>DysDf</i> /+    | 0.49 $\pm$ 0.17                      | 2.0X10 <sup>-5</sup> *** |
| <i>cora</i> <sup>k08713</sup> /+; <i>DysDf</i> /+ | 0.86 $\pm$ 0.07                      | 0.18                     |

<sup>1</sup> P-Values are relative to control animals of genotype *OregonR*,

\*P  $\leq$  0.05, \*\*P  $\leq$  0.01, \*\*\*P  $\leq$  0.001

<sup>2</sup> All values are normalized relative to *OregonR*

<sup>3</sup> errors reported represent the standard deviation

Supplementary Table 2: Decrease in *Dystrophin* mRNA level

| Genotype                 | <i>Dys</i><br>Average<br>C <sub>T</sub> | <i>RpL32</i><br>Average C <sub>T</sub> | $\Delta C_T$ <i>Dys</i> –<br><i>RpL32</i> <sup>1</sup> | $\Delta\Delta C_T$ ( $\Delta C_T$ –<br>$\Delta C_{T,control}$ <sup>2</sup> ) | Average <i>Dys</i><br>relative to<br>control <sup>3</sup> | <i>Dys</i> mRNA fold<br>reduction<br>relative to<br>control <sup>4</sup> |
|--------------------------|-----------------------------------------|----------------------------------------|--------------------------------------------------------|------------------------------------------------------------------------------|-----------------------------------------------------------|--------------------------------------------------------------------------|
| <i>tub-Gal4/+</i>        | 22.40±0.09                              | 18.35±0.20                             | 4.05±0.22                                              | 0.00±0.32                                                                    | 1.00±0.22                                                 | 1.00±0.22                                                                |
| <i>tub-Gal4::dsDys/+</i> | 22.26±0.06                              | 16.35±0.04                             | 5.91±0.08                                              | 1.86±0.24                                                                    | 0.28±0.05                                                 | 3.63±0.60                                                                |

<sup>1</sup> the  $\Delta C_T$  value is determined by subtracting the average *RpL32* C<sub>T</sub> value from the average *Dys* C<sub>T</sub> value. The standard deviation of the difference is calculated from the standard deviation of the *Dys* and *RpL32* values using the formula “ $s=\sqrt{(s_1^2+s_2^2)}$ ”, where s=stdev

<sup>2</sup> the calculation of the  $\Delta\Delta C_T$  involves subtraction by the  $\Delta C_T$  calibrator value. This standard deviation is determined the same as in ‘1’

<sup>3</sup> the range given for *Dys* relative to Control is determined by evaluating the expression:  $2^{-\Delta\Delta C_T}$  where the error is determined using regression analysis

<sup>4</sup> the fold reduction given for *Dys* relative to Control is determined by evaluating the expression:  $2^{\Delta\Delta C_T}$  where the error is determined using regression analysis

Supplementary Table 3: Decrease in *Dystrophin* mRNA level using *tub-Gal80<sup>ts</sup>* system

| Genotype                                                                          | <i>Dys</i><br>Average C <sub>T</sub> | <i>RpL32</i><br>Average C <sub>T</sub> | $\Delta C_T$ <i>Dys</i> –<br><i>RpL32</i> <sup>1</sup> | $\frac{\Delta \Delta C_T}{\Delta C_{T,cont}^2}$<br>( $\Delta C_T - \Delta C_{T,cont}^2$ ) | T<br>Index <sup>3</sup> | T corrected <i>Dys</i><br>mRNA fold<br>reduction relative<br>to control <sup>4</sup> |
|-----------------------------------------------------------------------------------|--------------------------------------|----------------------------------------|--------------------------------------------------------|-------------------------------------------------------------------------------------------|-------------------------|--------------------------------------------------------------------------------------|
| <i>tub-Gal80<sup>ts</sup>/+;</i><br><i>tub-Gal4/+</i><br>pupae at 18°C            | 24.46±0.16                           | 16.61±0.03                             | 7.86±0.17                                              | 0.00±0.24                                                                                 | -                       | 1.00±0.16                                                                            |
| <i>tub-Gal80<sup>ts</sup>/+;</i><br><i>tub-Gal4/+</i><br>pupae 3d. at 29°C        | 21.87±0.02                           | 16.53±0.27                             | 5.34±0.27                                              | -2.52±0.32                                                                                | 5.72                    | 1.00±0.31                                                                            |
| <i>tub-Gal80<sup>ts</sup>/+;</i><br><i>tub-Gal4::dsDys/+</i><br>pupae at 18°C     | 23.47±0.17                           | 16.20±0.06                             | 7.27±0.17                                              | 0.00±0.25                                                                                 | -                       | 1.00±0.17                                                                            |
| <i>tub-Gal80<sup>ts</sup>/+;</i><br><i>tub-Gal4::dsDys/+</i><br>pupae 3d. at 29°C | 22.60±0.12                           | 16.28±0.13                             | 6.32±0.17                                              | -0.95±0.25                                                                                | 5.72                    | 2.97±0.27                                                                            |
| <i>tub-Gal80<sup>ts</sup>/+;</i><br><i>tub-Gal4::dsDys/+</i><br>flies at 18°C     | 23.88±0.17                           | 18.19±0.29                             | 5.70±0.34                                              | 0.00±0.48                                                                                 | -                       | 1.00±0.33                                                                            |
| <i>tub-Gal80<sup>ts</sup>/+;</i><br><i>tub-Gal4::dsDys/+</i><br>flies 3d. at 29°C | 24.76±0.23                           | 17.28±0.03                             | 7.48±0.24                                              | 1.78±0.41                                                                                 | -                       | 3.44±0.99                                                                            |

<sup>1</sup> the  $\Delta C_T$  value is determined by subtracting the average *RpL32* CT value from the average *Dys* C<sub>T</sub> value. The standard deviation of the difference is calculated from the standard deviation of the *Dys* and *RpL32* values using the formula “ $s = \sqrt{(s_1^2 + s_2^2)}$ ”, where s=stdev

<sup>2</sup> the calculation of the  $\Delta \Delta C_T$  involves subtraction by the  $\Delta C_T$  calibrator value. This standard deviation is determined the same as in ‘1’

<sup>3</sup> the temperature dependent scaling factor was determined because expression levels of *Dys* in control pupae varied greatly depending on the temperature. Where applicable this value is calculated as  $2^{-\Delta \Delta C_T}$ . This scaling factor is then used to determine the relative expression levels in mutant animals of the same life stage at 29°C relative to the same animals at 18°C (Supplementary Figure 2)

<sup>4</sup> the fold reduction given for *Dys* relative to Control is determined by evaluating the expression:  $2^{\Delta \Delta C_T}$  where the error is determined using regressional analysis. The temperature related scaling index has been multiplied by this value where applicable

Supplementary Table 4: Frequency of muscle degeneration in *Dys RNAi* mutants with and without developmentally restricted expression of *RNAi*

| Genotype                                          | <i>Dys</i> down regulated | Condition <sup>1</sup>             | Age, days | n   | % of muscle degeneration | P-Value <sup>2</sup> | Normalized <sup>3</sup> % of muscle degeneration | P-Value <sup>2</sup> |
|---------------------------------------------------|---------------------------|------------------------------------|-----------|-----|--------------------------|----------------------|--------------------------------------------------|----------------------|
| <i>tub-Gal4/+</i>                                 | Throughout lifetime       | 25°C                               | 16        | 121 | 9.1                      | 0.021*               | 2.4                                              | 0.11                 |
| <i>tub-Gal4:dsDys</i>                             |                           |                                    |           | 73  | 21.9                     |                      |                                                  |                      |
| <i>tub-Gal80<sup>ts</sup>/+; tub-Gal4/+</i>       | As adult                  | 18°C development<br>29°C adulthood | 19        | 84  | 21.4                     | 0.0081<br>**         | 2.0                                              |                      |
| <i>tub-Gal80<sup>ts</sup>/+; tub-Gal4:dsDys/+</i> |                           |                                    |           | 108 | 42.6                     |                      |                                                  |                      |

<sup>1</sup> Note that higher temperature (29°C) accelerates aging and muscle degeneration.

<sup>2</sup> P-value determined from the  $\chi^2$  statistic

<sup>3</sup> Normalized to the control value under the same conditions

Supplementary Table 5: Relative Dg immunofluorescence intensities

| Genotype                                                 | Relative Intensity       | P-Value <sup>1</sup>       |
|----------------------------------------------------------|--------------------------|----------------------------|
| <i>OregonR</i> <sup>2</sup>                              | 1.00 ± 0.37 <sup>3</sup> | -                          |
| <i>DysDf</i>                                             | 0.49 ± 0.27              | 0.042*                     |
| <i>Dg</i> <sup>O55</sup>                                 | 0.02 ± 0.02              | 1.2 X 10 <sup>-4</sup> *** |
| <i>cora</i> <sup>k08713</sup>                            | 0.11 ± 0.11              | 1.4 X 10 <sup>-3</sup> **  |
| <i>Dg</i> <sup>O86/+</sup> ; <i>DysDf</i> /+             | 0.06 ± 0.05              | 1.9 X 10 <sup>-5</sup> *** |
| <i>cora</i> <sup>k08713/+</sup> ;<br><i>DysDf</i> /+     | 0.07 ± 0.06              | 1.1 X 10 <sup>-4</sup> *** |
| <i>cora</i> <sup>k08713</sup> / <i>Dg</i> <sup>O86</sup> | 0.10±0.12                | 9,9 X 10 <sup>-5</sup> *** |

<sup>1</sup> P-Values are relative to control animals of genotype *OregonR*,

\*P ≤ 0.05, \*\*P ≤ 0.01, \*\*\*P ≤ 0.001

<sup>2</sup> All values are normalized relative to *OregonR*

<sup>3</sup> errors reported represent the average deviation

Supplementary Table 6: Decrease in *Dystroglycan* mRNA level

| Genotype                                                                         | <i>Dg</i> Average $C_T$ | <i>RpL32</i> Average $C_T$ | $\Delta C_T$ <i>Dg</i> - <i>RpL32</i> <sup>1</sup> | $\Delta\Delta C_T$ ( $\Delta C_T$ - $\Delta C_{T,control}$ ) <sup>2</sup> | Average <i>Dg</i> relative to control <sup>3</sup> | <i>Dg</i> mRNA fold reduction relative to control <sup>4</sup> |
|----------------------------------------------------------------------------------|-------------------------|----------------------------|----------------------------------------------------|---------------------------------------------------------------------------|----------------------------------------------------|----------------------------------------------------------------|
| <i>tub-Gal4/+</i>                                                                | 23.33±0.07              | 18.35±0.20                 | 4.98±0.21                                          | 0.00±0.30                                                                 | 1.00±0.21                                          | 1.00±0.21                                                      |
| <i>tub-Gal4::dsDg/+</i>                                                          | 25.94±0.13              | 18.37±0.11                 | 7.57±0.18                                          | 2.59±0.28                                                                 | 0.17±0.03                                          | 6.02±1.16                                                      |
| <i>tub-Gal80<sup>ts</sup>/+;</i><br><i>tub-Gal4::dsDg/+</i><br>flies at 18°C     | 20.97±0.05              | 16.09±0.05                 | 4.87±0.07                                          | 0.00±0.10                                                                 | 1.00±0.07                                          | 1.00±0.07                                                      |
| <i>tub-Gal80<sup>ts</sup>/+;</i><br><i>tub-Gal4::dsDg/+</i><br>flies 3d. at 29°C | 25.26±0.07              | 19.09±0.03                 | 6.17±0.08                                          | 1.29±0.11                                                                 | 0.41±0.03                                          | 2.45±0.18                                                      |

<sup>1</sup> the  $\Delta C_T$  value is determined by subtracting the average *RpL32*  $C_T$  value from the average *Dg*  $C_T$  value. The standard deviation of the difference is calculated from the standard deviation of the *Dg* and *RpL32* values using the formula " $s=\sqrt{(s_1^2+s_2^2)}$ ", where  $s$ =stdev

<sup>2</sup> the calculation of the  $\Delta\Delta C_T$  involves subtraction by the  $\Delta C_T$  calibrator value. This standard deviation is determined the same as in '1'

<sup>3</sup> the range given for *Dg* relative to Control is determined by evaluating the expression:  $2^{-\Delta\Delta C_T}$  where the error is determined using regression analysis

<sup>4</sup> the fold reduction given for *Dg* relative to Control is determined by evaluating the expression:  $2^{\Delta\Delta C_T}$  where the error is determined using regression analysis

Supplementary Table 7: Impact of Ca<sup>2+</sup> channel blockers on seizure activity of dystrophic animals (*DysDf*)

| Drug              | n | %Seized <sup>‡</sup> | Avg. T <sub>s</sub> ±sd (°C)* | Avg. A <sub>max</sub> ±sd (mV)* | Avg. Area±sd (pixel x 10 <sup>-3</sup> )* | Median S <sub>i</sub> ** (25 <sup>th</sup> /75 <sup>th</sup> percentiles) | P-Value |
|-------------------|---|----------------------|-------------------------------|---------------------------------|-------------------------------------------|---------------------------------------------------------------------------|---------|
| Sucrose           | 5 | 80                   | 37.8±2.1                      | 6.6±5.7                         | 2.4 ±1.9                                  | 1.9 (1.8/2.1)                                                             | -       |
| 3.6 mM Nifedipine | 5 | 100                  | 37.8±3.3                      | 3.1±2.2                         | 1.2 ± 0.5                                 | 1.8 (1.8/1.9)                                                             | 0.50    |
| 0.5 mM 2-APB      | 5 | 60                   | 35.7±5.7                      | 2.8±1.2                         | 0.8 ± 0.4                                 | 1.5 (0.0/1.7)                                                             | 0.21    |
| 20 μM Ryanodine   | 6 | 33                   | 34.4±0.6                      | 2.8±0.6                         | 0.9 ±0.2                                  | 0.0 (0.0/1.4)                                                             | 0.078   |

n = number of animals fed the indicated drug

‡ percent of animals measured that had a seizure

\* Calculated using data from animals that seized only

\*\* Index calculated by integrating the area of the graph of voltage vs. temperature during a seizure, taking the natural logarithm of this number, dividing by the temperature that the seizure started, and then multiplying times ten.



## Supplementary Figure Legends

### Supplementary Figure 1:

Control animals do not have temperature-sensitive seizures as can be seen by monitoring the output voltage from the IFMs as the temperature increases. b) All tested *Dys* mutant alleles exhibit hyperthermic seizures.

### Supplementary Figure 2:

Average *Dys* expression relative to appropriate controls in *RNAi* knock-down mutants that are under the control of the *tub-Gal80<sup>ts</sup>* driver. a) Control pupae showed a vast increase in *Dys* expression upon being shifted from 18°C to 29°C indicating a natural increase in protein expression with temperature increase. Thus, to determine adequately the effectiveness of *RNAi* down-regulation this change in expression had to be taken into consideration using a temperature index (Supplementary Table 5). b) Average *Dys* expression levels relative to control in pupae (after the temperature index was considered) and in adults after being shifted to 29°C for four days.

### Supplementary Figure 3:

Seizure indices showing that animals with *RNAi* directed against muscle (*24B-Gal4*) and mononeuron (*D42-Gal4*) *Dg* mRNA do not have temperature-sensitive seizures. Endogenous (*tub-Gal4*) expression results in a reduced amount of seizures that are not significant over controls, but this is reversed when *Dg* is down-regulated after development. Refer to Table 1 for exact P-values compared to control animals.

#### Supplementary Figure 4:

a)  $\beta_{PS}$  integrin subunit loss of function allele heterozygotes (*mys*<sup>1/+</sup>) had seizures when heated, most likely due to compromised stability of the sarcolemma and/or NMJ. Introducing a mutant copy of *Dg* into the genome of these animals does not alter the seizure character. b) Seizure indices of *mys*<sup>1/+</sup> heterozygous and *mys*<sup>1/+</sup>; *Dg*/+ transheterozygous animals where a Kruskal-Wallis test show that there are no significances in the indices ( $\chi^2 = 2.93$ ,  $P = 0.231$ ). The following P-values were determined upon comparison to wild type animals: *mys*<sup>1/+</sup> (\*\* $P = 2.0 \times 10^{-4}$ ), *mys*<sup>1/+</sup>; *Dg*<sup>086/+</sup> (\* $P = 0.013$ ), *mys*<sup>1/+</sup>; *Dg*<sup>055/+</sup> (\* $P = 0.082$ ) using a one-tailed Mann-Whitney U-test. 100% of *mys*<sup>1/+</sup> animals tested had seizures (n=8) with  $T_s = 39.2 \pm 2.6$ ,  $A_{max} = 3.6 \pm 1.7$  and Avg. Area =  $1.5 \pm 1.1 \times 10^3$ . 80% of *mys*<sup>1/+</sup>; *Dg*<sup>086/+</sup> animals tested had seizures (n=5) with  $T_s = 36.0 \pm 0.7$ ,  $A_{max} = 3.8 \pm 2.4$  and Avg. Area =  $1.2 \pm 0.5 \times 10^3$ . 83% of *mys*<sup>1/+</sup>; *Dg*<sup>055/+</sup> animals tested had seizures (n=6) with  $T_s = 40.3 \pm 3.7$ ,  $A_{max} = 4.3 \pm 3.0$  and Avg. Area =  $1.2 \pm 1.0 \times 10^3$ .

#### Supplementary Figure 5:

a) TGF- $\beta$  pathway mutants, *tkv* (type-I receptor) and *Mad* (receptor-regulated Smad) have seizures similar to what is seen in *Dys* mutants, however; when animals are missing one copy of *Dys* and one copy of each of these genes there is no significant increase in seizures over what is seen in *Dys*. Down-regulation of *tkv* after NMJ development (*tub-Gal80<sup>ts</sup>*) does not alleviate seizures implying that there is an additional need for *tkv* after development is complete. Animals that express *RNAi* against *tkv* prior to pupae formation die supporting an important role for TGF- $\beta$  signaling during pupation. Transheterozygous animals when compared to *Dys* heterozygous

animals using a Mann-Whitney U-test had P-values of 0.25 and 0.46 for *tkv/Dys* and *Mad/Dys* respectively and P-values of 0.099 and 0.040 when compared to control animals respectively. Animals of genotypes *tkv<sup>1</sup>*, *tub-Gal80<sup>ts</sup>/act-Gal4;tkv<sup>RNAi</sup>* and *Mad<sup>12</sup>/+* have P-values of  $1.9 \times 10^{-3}$ , 0.012 and 0.072 when compared to controls respectively. 100% of *tkv<sup>1</sup>* animals tested had seizures (n=9) with  $T_s = 39.4 \pm 4.7$ ,  $A_{max} = 4.8 \pm 3.6$  and Avg. Area =  $1.3 \pm 0.8 \times 10^3$ . 60% of *tkv<sup>1</sup>/+;DysDf/+* animals tested had seizures (n=5) with  $T_s = 44.2 \pm 2.1$ ,  $A_{max} = 7.4 \pm 1.3$  and Avg. Area =  $1.9 \pm 1.3 \times 10^3$ . 67% of *Mad<sup>12</sup>/+;DysDf/+* animals tested had seizures (n=6) with  $T_s = 42.2 \pm 4.0$ ,  $A_{max} = 15 \pm 8.7$  and Avg. Area =  $2.0 \pm 1.0 \times 10^3$ . 80% of *Mad<sup>12</sup>/+* animals tested had seizures (n=5) with  $T_s = 42.8 \pm 3.2$ ,  $A_{max} = 8.8 \pm 6.3$  and Avg. Area =  $1.7 \pm 1.4 \times 10^3$ . 100% of *tub-Gal80<sup>ts</sup>/act-Gal4; tkv<sup>RNAi</sup>/+* animals tested had seizures (n=5) with  $T_s = 40.0 \pm 3.4$ ,  $A_{max} = 7.3 \pm 2.8$  and Avg. Area =  $4.4 \pm 2.8 \times 10^3$ . b) Electrical output from IFM vs. temperature of TGF- $\beta$  pathway mutants exhibiting seizures. \*P  $\leq$  0.05, \*\*P  $\leq$  0.01 and \*\*\*P  $\leq$  0.001

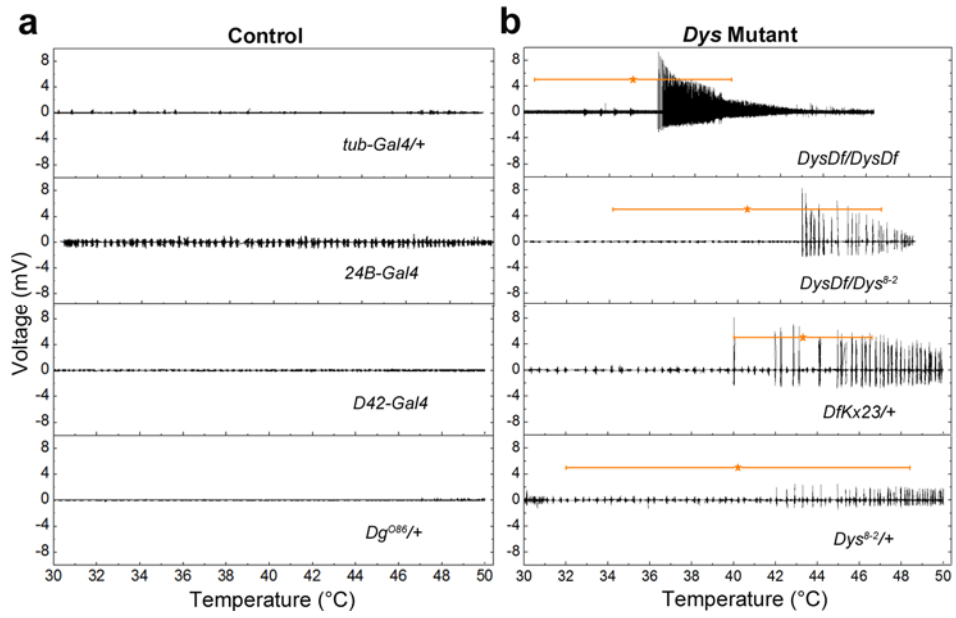

Supplementary Figure 1

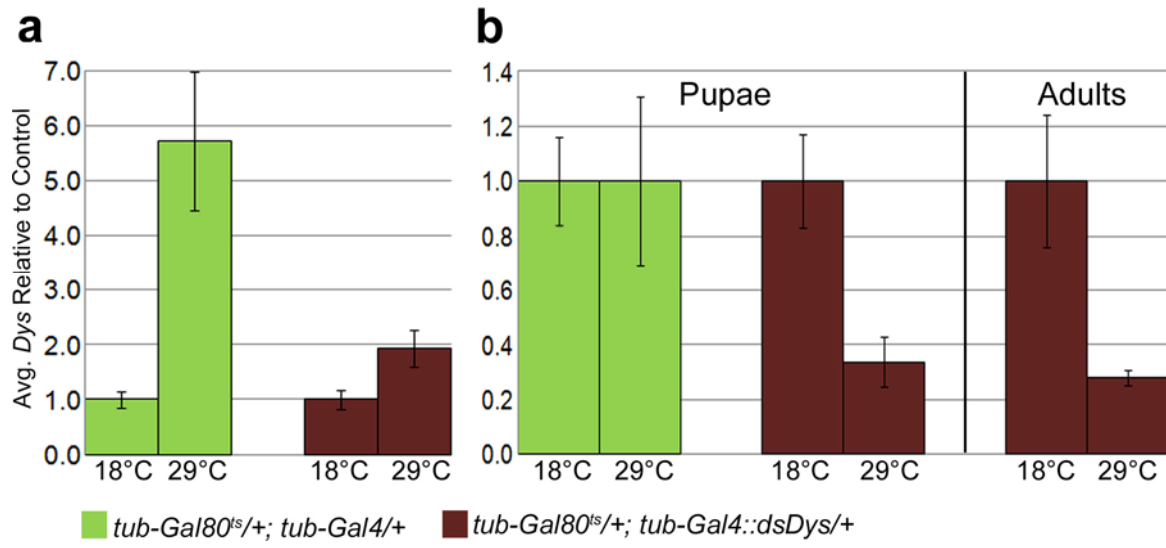

Supplementary Figure 2

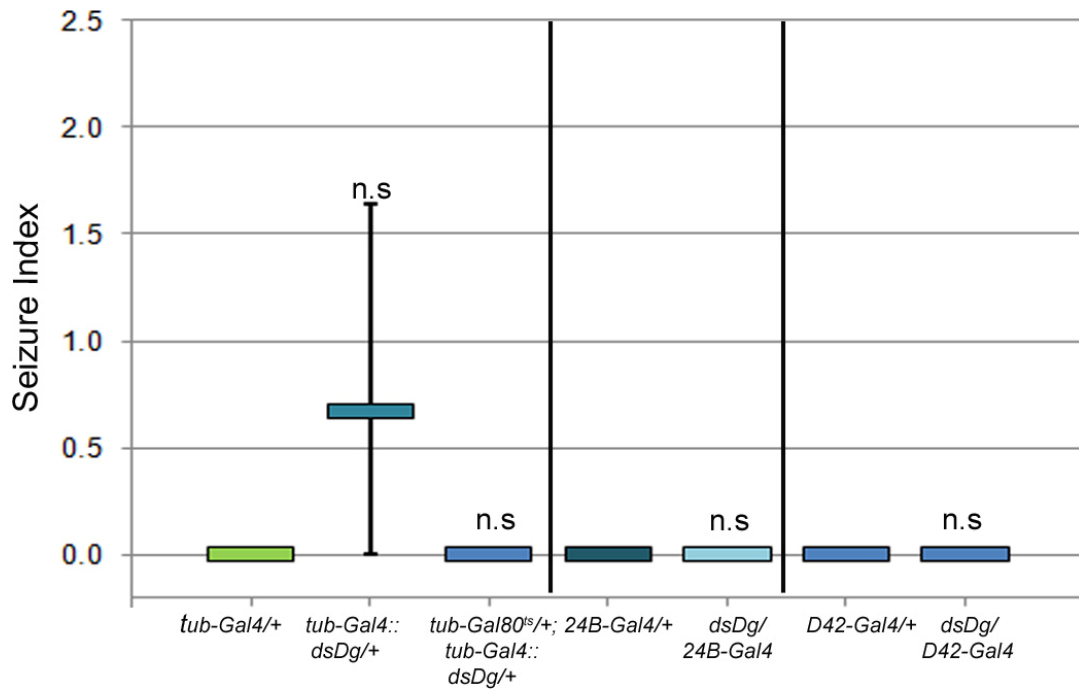

Supplementary Figure 3

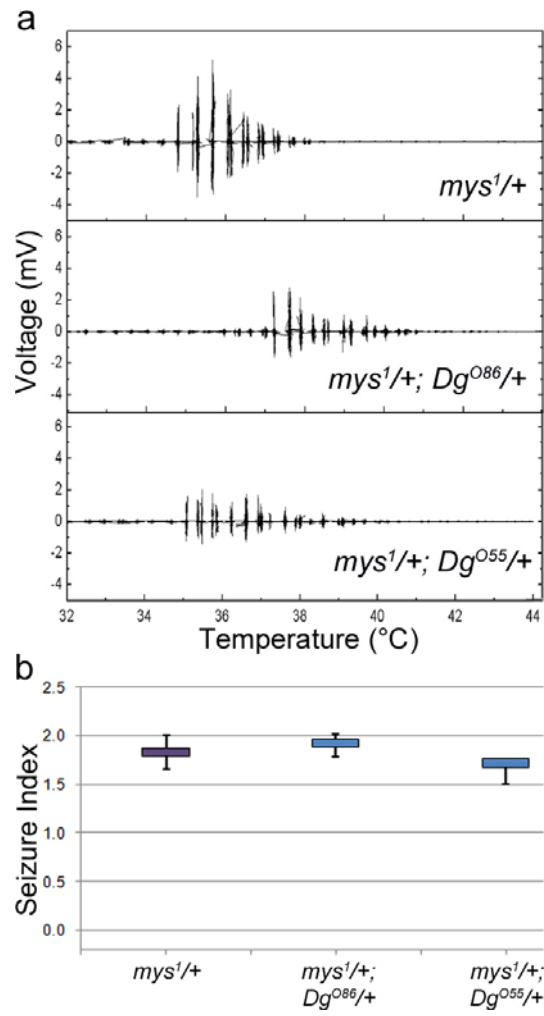

Supplementary Figure 4

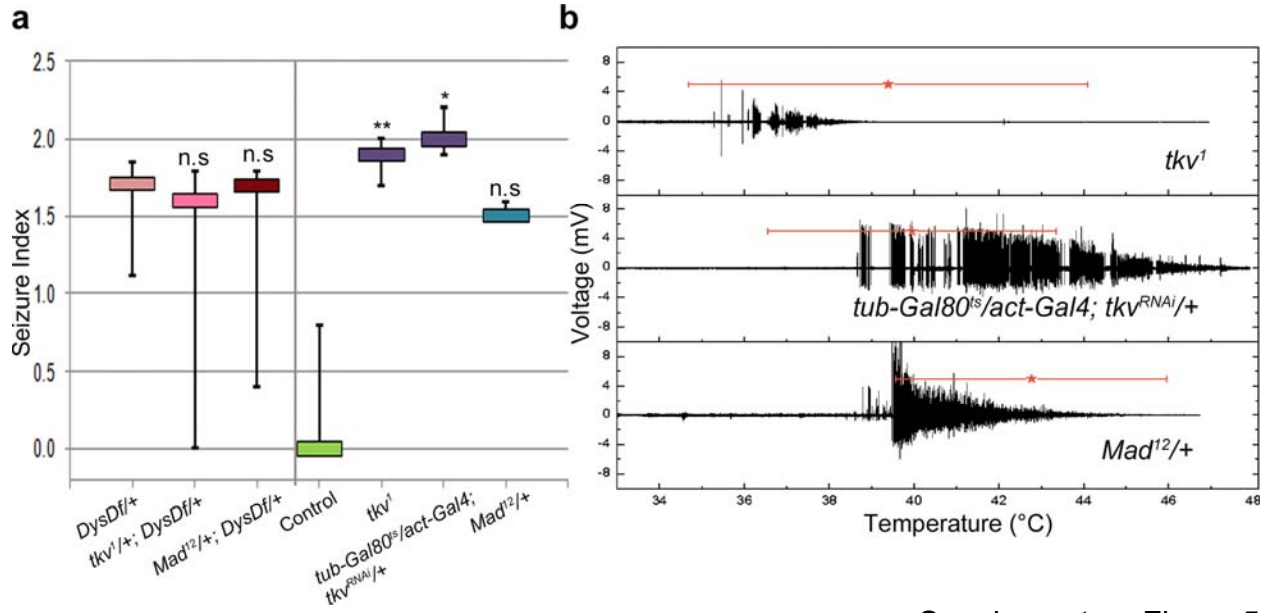

Supplementary Figure 5
